# Supplementary material for: Canine Fibroblast Growth Factor 21 Ameliorates Hyperglycemia Associated with Inhibiting Hepatic Gluconeogenesis and Improving Pancreatic Beta-Cell Survival in Diabetic Mice and Dogs
Source: PLoS One. 2016 May 20;11(5):e0155598. doi: 10.1371/journal.pone.0155598 (PMC4874679; doi:10.1371/journal.pone.0155598)
Supplement: S4 Dataset — (XLS) [file pone.0155598.s004.xls]

## Sheet: Sheet1
	Pancreas
	CAT	GR	SOD	GSH-Px
C1	48.79	311.3	100.6	674.34
C2	45.2	287.5	123.4	500.67
C3	31.76	307.6	89.7	721.8
C4	36.81	323.8	123.6	607.8
C5	49.67	266.9	99.3	658.3
C6	35.96	257.4	90.5	586.1
M1	14.76	196.3	56.4	287.6
M2	28.65	169.3	44.3	206.4
M3	11.46	178.6	38.6	309.6
M4	22.6	150.4	35.3	218.6
M5	18.9	163.9	49.7	226.9
M6	27.3	146.8	33.9	257.3
F1	36.76	300.7	121.8	587.5
F2	28.29	265.2	109.6	512.4
F3	30.25	271.9	139.5	438.7
F4	25.87	207.8	132.7	506.5
F5	33.59	193.2	98.6	423.7
F6	40.63	278.5	100.4	465.3
Liver
	CAT	GR	SOD	GSH-Px
C1	93.45	389.6	89.3	804.6
C2	63.27	400.3	76.4	793.2
C3	77.82	329.6	102.6	870.4
C4	86.73	378.9	113.2	727.6
C5	60.27	348.2	96.4	702.4
C6	75.83	307.5	79.2	653.7
M1	27.32	121.8	57.4	174.5
M2	20.16	143.7	43.3	253.2
M3	31.7	158.4	39.6	156.8
M4	18.9	189.4	32.8	173.7
M5	33.6	134.7	26.3	198.3
M6	24.5	142.1	25.7	232.6
F1	65.36	227.4	100.4	423.4
F2	48.6	256.3	134.2	504.7
F3	59.37	293.2	99.6	478.4
F4	72.6	280.4	113.2	421.5
F5	46.4	319.3	105.9	523.8
F6	55.8	269.5	84.7	398.6
